# Supplementary material for: Ligand-dependent kinase activity of MERTK drives efferocytosis in human iPSC-derived macrophages
Source: PubMed Central journal article supplement (PMC8149813; doi:10.1038/s41419-021-03770-0), 2021-05-25
Supplement: 41419_2021_3770_MOESM5_ESM.pdf [file 41419_2021_3770_MOESM5_ESM.pdf]

1 **Supplementary Figure Legends**

2 **Suppl. Figure 1: Expression of AXL and MERTK in human monocyte-derived**  
3 **macrophages**

4 (A-D) Monocytes were isolated from PBMCs and cultured *in vitro* using either M-CSF or GM-  
5 CSF. Macrophages were stimulated with Poly I:C or dexamethasone or left untreated. After 24  
6 hours AXL and MERTK expression was determined by flow cytometry. (A-B) Representative  
7 histograms showing expression of AXL and MERTK on M-CSF differentiated macrophages  
8 upon stimulation using indicated conditions. Bar graphs show geometrical mean fluorescence  
9 intensity of AXL and MERTK. Shown is mean with SD and individual samples. (C-D)  
10 Representative histograms showing expression of AXL and MERTK on M-CSF differentiated  
11 macrophages upon stimulation using indicated conditions. Bar graphs show geometrical mean  
12 fluorescence intensity of AXL and MERTK. Shown is mean with SD and individual samples.  
13 Data is representative of at least three individual experiments with three technical replicates.

14 **Suppl. Figure 2: Expression of AXL and MERTK and efferocytosis in iPSC-derived**  
15 **macrophages derived from SFC840 and Neo clone**

16 A) iPSC-derived macrophages were differentiated *in vitro* using serum-containing or serum-  
17 free medium. Flow cytometric analysis of efferocytosis under indicated conditions. Bar graphs  
18 show mean with SD and individual samples. (B-C) Macrophages were differentiated *in vitro*  
19 from macrophage progenitor cells derived from the SFC840 or Neo Clone. For differentiation  
20 either M-CSF or GM-CSF was used. Macrophages were stimulated with Poly I:C or  
21 dexamethasone or left untreated. After 24 hours AXL and MERTK expression was determined  
22 by flow cytometry. Bar graphs show geometrical mean fluorescence intensity of AXL and  
23 MERTK. Shown is mean with SD and individual samples (D-E). Macrophages were  
24 differentiated *in vitro* from macrophage progenitor cells derived from the SFC840 or Neo  
25 Clone. D) Flow cytometric analysis of efferocytosis *in vitro* using iPSC-derived macrophages.

26 ACs were generated as described and live cells (LC) were used as control. ACs were labeled  
27 with indicated concentrations of GAS6. For LCs GAS6 was added soluble. Macrophages and  
28 ACs were cultured for 2 hours at a ratio of 1:6 and analyzed afterwards for pHrodo signal. E)  
29 Frequency of pHrodo<sup>+</sup> macrophages. Bar graphs show mean with SD and individual samples.  
30 Data is representative of at least three individual experiments with three technical replicates.

### 31 **Suppl. Figure 3: Generation of biologically active murine GAS6**

32 (A, C, E) Sensorgrams for the interaction of in-house produced murine GAS6 and murine  
33 GAS6 from R&D with phosphatidylserine (PtdSer) containing lipid membranes (A) and  
34 control lipid membranes without PtdSer (C). GAS6 was injected in three different  
35 concentrations (blue: 320 nM / green: 160 nM / red: 80 nM). As a control, the binding of in-  
36 house produced GAS6 to PtdSer containing lipid membranes was assessed in the presence of  
37 4 mM EDTA. (B,D) Sensorgrams for the interaction of AXL and MERTK with in-house  
38 produced murine GAS6 bound PtdSer containing lipid membranes (B) and to lipid membranes  
39 without mGas6 (D). MERTK was injected in two and AXL in three different concentrations  
40 (blue: 28 nM / green: 14 nM / red: 7 nM ). F) Westernblot analysis for gamma-carboxylation  
41 in the Gla-domain of murine recombinant GAS6 produced internally or commercially available  
42 from R&D.

### 43 **Suppl. Figure 4: Efferocytosis in murine bone marrow-derived macrophages**

44 A) Murine macrophages were differentiated from bone marrow precursor cells for 7 days using  
45 recombinant murine M-CSF. Apoptotic thymocytes were generated as described, labeled with  
46 pHrodo-Red and either left untreated or coated with murine recombinant GAS6 (50 nM).  
47 Macrophages and apoptotic thymocytes were co-cultured for 2 hours at a ratio of 1:6.  
48 Afterwards, cells were detached and stained for CD11b and F4/80. Efferocytic macrophages  
49 were quantified via Flow cytometry. Bar graphs show mean with SD and individual samples  
50 of three individual experiments (n=1).
